# Supplementary material
Source: HighWire-hosted journal article supplement (https://bmjopen.bmj.com/content/9/6/e027700)
Supplement: inline-supplementary-material-1 [file inline-supplementary-material-1.pdf]

**Supplementary Material for Here one year, gone the next? Investigating duration and predictors of ongoing frequent emergency department attendance, a retrospective study in Australia.**

**Table 1.** Diagnostic profile of all ED frequent attenders<sup>1</sup> by age group

| % of frequent attenders                                      | Age group <sup>2</sup> |      |       |       |       |       |      |      |
|--------------------------------------------------------------|------------------------|------|-------|-------|-------|-------|------|------|
|                                                              | 0-4                    | 5-15 | 16-24 | 25-44 | 45-64 | 65-74 | 75+  | All  |
|                                                              | N persons              |      |       |       |       |       |      |      |
|                                                              | 788                    | 768  | 1004  | 1867  | 1677  | 1042  | 1431 | 8577 |
| Most common Major Diagnostic Block                           |                        |      |       |       |       |       |      |      |
| Alcohol/drug abuse and alcohol/drug induced mental disorders | 0.0                    | 0.0  | 1.0   | 2.2   | 2.0   | 0.1   | 0.0  | 1.0  |
| Circulatory system illness                                   | 0.4                    | 1.8  | 3.6   | 5.6   | 17.2  | 24.7  | 24.3 | 12.3 |
| Digestive system illness                                     | 12.4                   | 20.3 | 22.5  | 16.2  | 15.3  | 12.7  | 13.2 | 15.9 |
| Endocrine, nutritional and metabolic system illness          | 0.6                    | 1.0  | 1.2   | 1.1   | 0.9   | 1.1   | 1.0  | 1.0  |
| Illness of skin, subcutaneous tissue, breast                 | 1.9                    | 4.2  | 5.2   | 6.6   | 4.8   | 3.0   | 2.7  | 4.3  |
| Injury, single site, major                                   | 13.6                   | 29.7 | 17.1  | 12.6  | 5.4   | 3.6   | 6.2  | 11.2 |
| Musculoskeletal/connective tissue system illness             | 0.6                    | 2.6  | 3.7   | 6.9   | 5.5   | 5.1   | 3.8  | 4.6  |
| Neurological system illness                                  | 5.2                    | 4.4  | 4.1   | 6.4   | 6.5   | 5.7   | 6.8  | 5.8  |
| Psychiatric illness                                          | 0.1                    | 10.2 | 13.9  | 16.3  | 7.0   | 1.5   | 1.0  | 7.8  |
| Respiratory system illness                                   | 44.4                   | 5.3  | 4.5   | 3.9   | 14.5  | 19.6  | 17.6 | 14.1 |
| Urological system illness                                    | 1.0                    | 1.8  | 2.4   | 2.1   | 4.2   | 10.5  | 13.7 | 5.4  |
| Other MDBs                                                   | 19.7                   | 18.6 | 20.8  | 20.3  | 16.6  | 12.7  | 9.8  | 16.7 |
| Major Diagnostic Block during study period                   |                        |      |       |       |       |       |      |      |
| Alcohol/drug abuse and alcohol/drug induced mental disorders | 0.0                    | 9.2  | 12.5  | 16.1  | 9.6   | 1.4   | 0.8  | 8.0  |
| Circulatory system illness                                   | 4.6                    | 27.3 | 31.7  | 40.8  | 61.9  | 73.3  | 73.1 | 48.7 |
| Digestive system illness                                     | 65.7                   | 69.5 | 63.6  | 60.2  | 61.6  | 65.4  | 62.0 | 63.1 |
| Endocrine, nutritional and metabolic system illness          | 7.0                    | 7.0  | 5.6   | 10.0  | 19.5  | 22.1  | 20.6 | 14.0 |
| Illness of skin, subcutaneous tissue, breast                 | 38.8                   | 39.1 | 39.2  | 39.1  | 35.1  | 32.6  | 28.0 | 35.5 |
| Injury, single site, major                                   | 63.3                   | 83.6 | 68.6  | 62.6  | 52.7  | 43.5  | 51.8 | 59.2 |
| Musculoskeletal/connective tissue system illness             | 16.6                   | 53.4 | 46.6  | 49.8  | 49.5  | 47.1  | 43.9 | 45.3 |
| Neurological system illness                                  | 18.8                   | 31.3 | 36.8  | 40.4  | 42.7  | 48.9  | 55.2 | 41.1 |
| Psychiatric illness                                          | 1.7                    | 36.6 | 41.5  | 44.1  | 27.4  | 16.5  | 15.0 | 27.8 |
| Respiratory system illness                                   | 84.5                   | 44.0 | 38.6  | 38.5  | 54.7  | 61.6  | 64.1 | 53.7 |
| Urological system illness                                    | 11.6                   | 21.9 | 23.7  | 20.4  | 30.8  | 44.6  | 49.8 | 30.0 |

<sup>1</sup> Excludes planned return visits

<sup>2</sup> Age group at first visit in first period of frequent attendance.
